# Supplementary material for: Electronic structure and magnetic exchange interactions of Cr-based van der Waals ferromagnets. A comparative study between CrBr3 and Cr2Ge2Te6
Source: Royal Society of Chemistry journal article supplement (doi:10.1039/d0tc02003f), 2020-01-01
Supplement: d0tc02003f1.pdf [file d0tc02003f1.pdf]

## Supplemental material

### MAGNETIC CONFIGURATIONS TO EXTRACT $J_{in}$ AND $J_{out}$

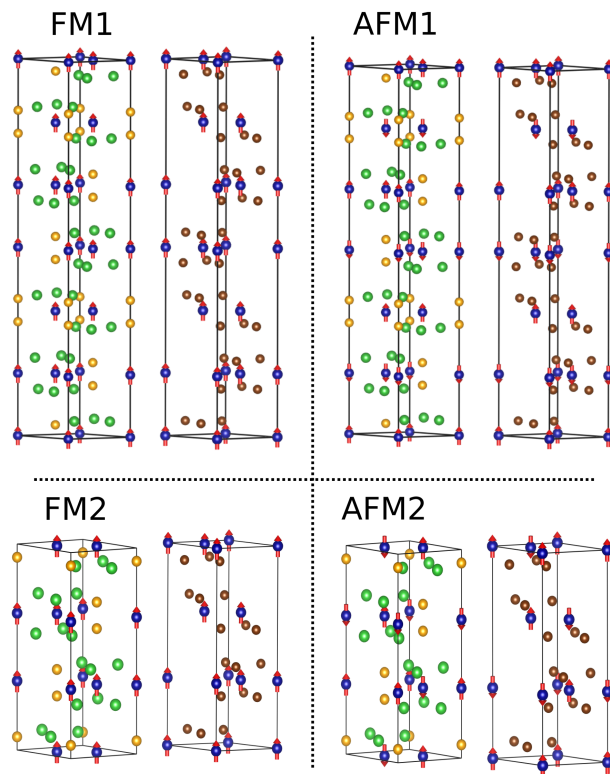

FIG. 1. Magnetic configurations used to compute the magnetic exchange constants. Cr atom in blue, Br atom in brown, Ge atom in yellow and Te atom in green.

Magnetic exchange constants ( $J_{out}$  and  $J_{in}$ ) were computed using the configurations shown in Fig. 1. The following equations were obtained considering a Heisenberg-type Hamiltonian

$$\begin{aligned} J_{out} &= \frac{E_{AFM1} - E_{FM1}}{27} \\ J_{in} &= \frac{1}{3} \left( \frac{2(E_{AFM2} - E_{FM1})}{27} - J_{out} \right), \end{aligned} \quad (1)$$

where  $E_{FM1}$ ,  $E_{AFM1}$ ,  $E_{FM2}$  and  $E_{AFM2}$  are the energies of the magnetic configurations (Fig. 1).
